# Supplementary material for: Fe-Doped polydopamine nanoparticles with peroxidase-mimicking activity for the detection of hypoxanthine related to meat freshness
Source: Royal Society of Chemistry journal article supplement (doi:10.1039/d1an02325j), 2022-01-01
Supplement: d1an02325j1.pdf [file d1an02325j1.pdf]

## Supporting information

### **Fe-doped polydopamine nanoparticles with peroxidase-mimicking activity for the detection of hypoxanthine related to meat freshness**

Yiyin Zhang, Xiang Gao, Yingwang Ye,\* and Yizhong Shen\*

School of Food & Biological Engineering, Key Laboratory for Agricultural Products Processing of Anhui Province, Hefei University of Technology, Hefei 230009, China.

\*Corresponding authors. E-mails: yeyw04@mails.ucas.ac.cn (Y. Ye);

yzshen@hfut.edu.cn (Y. Shen)

### **Table of contents**

|   |                                   | Pages        |
|---|-----------------------------------|--------------|
| 1 | Supplementary Fig. S1 to S10      | Page S2 – S6 |
| 2 | Supplementary Table S1 & Table S2 | Page S6 – S7 |
| 3 | References                        | Page S7 – S8 |

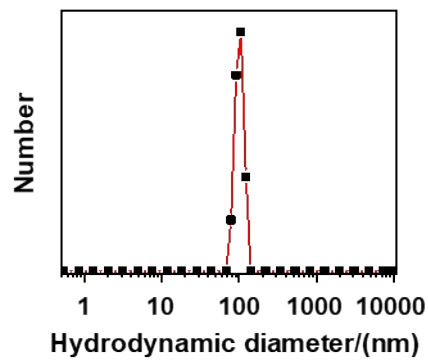

**Fig. S1** DLS of Fe-PDA nanoparticles in D.I. water.

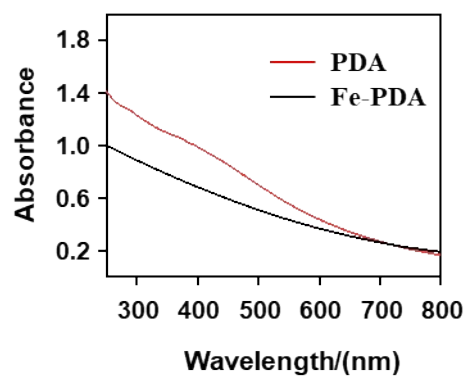

**Fig. S2** UV-vis absorption spectra of Fe-PDA and PDA nanoparticles in D.I. water.

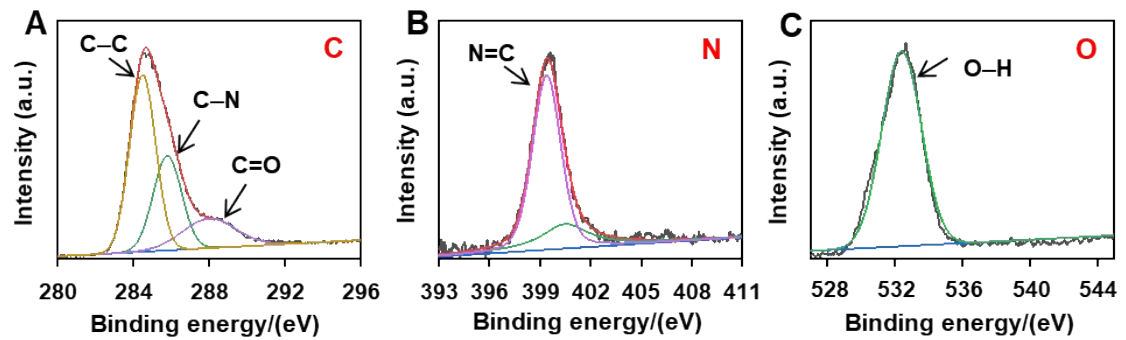

**Fig. S3** High-resolution of (A) C 1s, (B) N 1s, and (C) O 1s spectra of PDA nanoparticles, respectively.

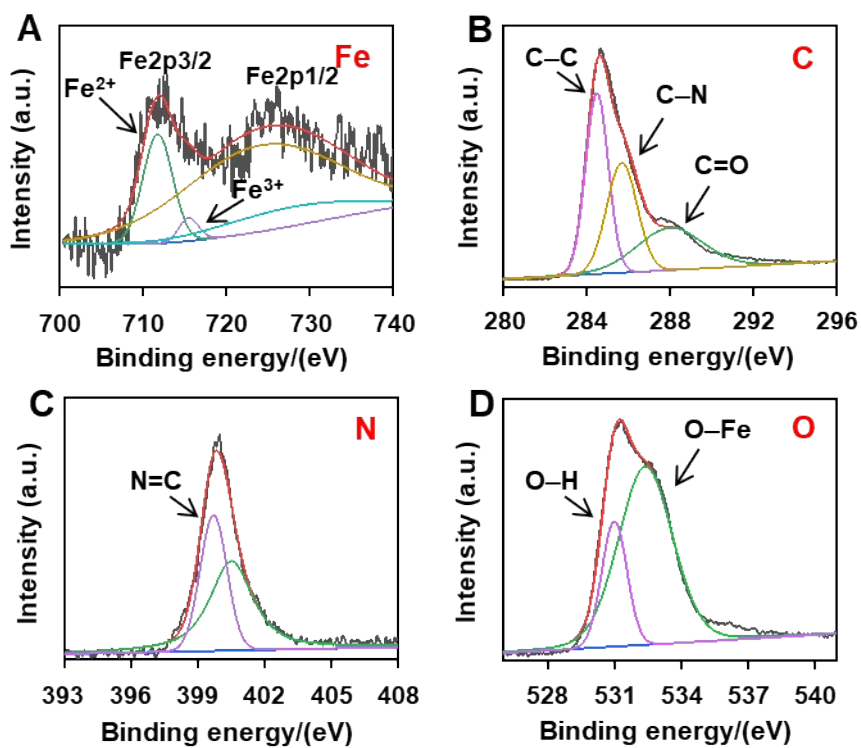

**Fig. S4** High-resolution of (A) Fe 2p, (B) C 1s, (C) N 1s, and (D) O 1s spectra of Fe-PDA nanoparticles, respectively.

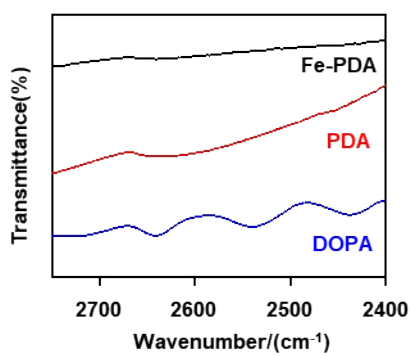

**Fig. S5** FT-IR spectra of DOPA, PDA and Fe-PDA.

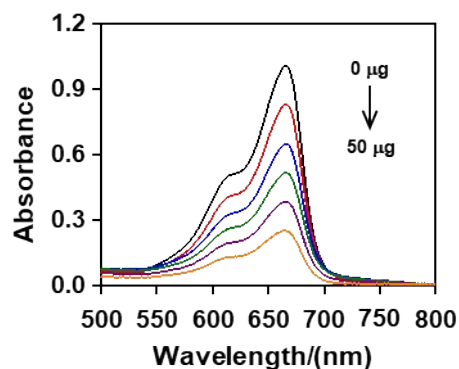

**Fig. S6** The absorption spectra of methylene blue (MB) degradation by different concentrations of Fe-PDA nanoparticles. Fe-PDA nanoparticles at 0, 10, 20, 30, 40 and 50  $\mu\text{g}\cdot\text{mL}^{-1}$  were incubated with 5  $\mu\text{g}\cdot\text{mL}^{-1}$  MB at 37 °C for 2 h. After incubation, 200  $\mu\text{M}$  of  $\text{H}_2\text{O}_2$  was added for 15 min and the absorbance at 500-800 nm was measured using UV spectrophotometer.

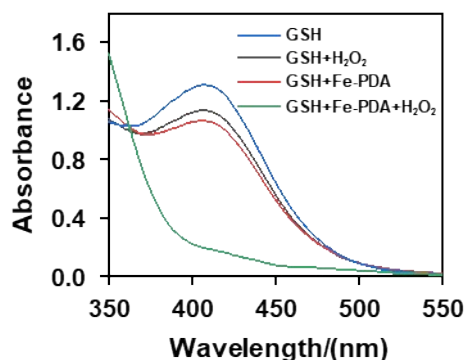

**Fig. S7** Absorption spectra of GSH, GSH +  $\text{H}_2\text{O}_2$ , GSH + Fe-PDA, GSH + Fe-PDA +  $\text{H}_2\text{O}_2$  after incubated with 5,5'-Dithiobis-(2-nitrobenzoic acid) (DTNB). 0.4 mM of GSH was reacted with  $\text{H}_2\text{O}_2$ , Fe-PDA, Fe-PDA +  $\text{H}_2\text{O}_2$  at 37 °C for 1 h, and 0.15 mM of DTNB was added to develop the color and measured the absorbance at 350-550 nm. GSH without anything added was used as a control. Where the concentration of  $\text{H}_2\text{O}_2$  was 200  $\mu\text{M}$  and Fe-PDA was 50  $\mu\text{g}\cdot\text{mL}^{-1}$ .

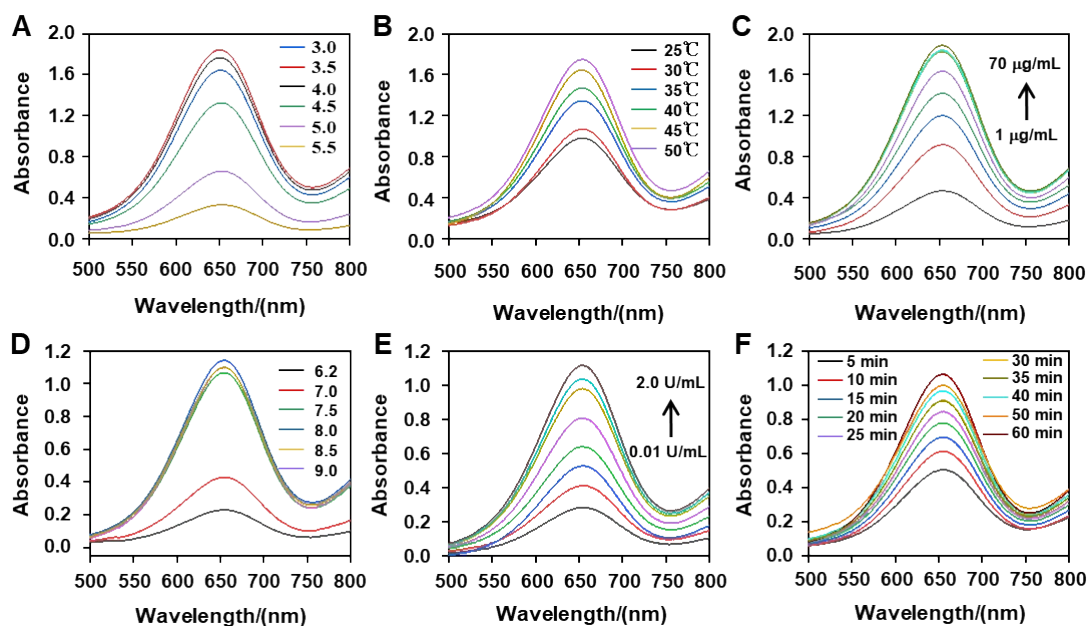

**Fig. S8** UV-vis absorption spectra of (A) pH value of Fe-PDA nanoenzyme, (B) incubation temperature, (C) the concentration of Fe-PDA nanoenzyme, (D) pH value of XOD, (E) XOD concentration, (F) incubation time of Hx reacting with XOD for the responding to Hx based on this Fe-PDA nanoenzyme sensing system. All experiments under the following conditions:  $\text{H}_2\text{O}_2$ , 100.0  $\mu\text{M}$ ; TMB, 1.0 mM; Fe-PDA nanoparticles, 50.0  $\mu\text{g}\cdot\text{mL}^{-1}$ , an optimized XOD concentration, 1.0  $\text{U}\cdot\text{mL}^{-1}$ ; incubation time of Hx reacting with XOD, 40.0 min; XOD catalyzes Hx solution pH 3.5.

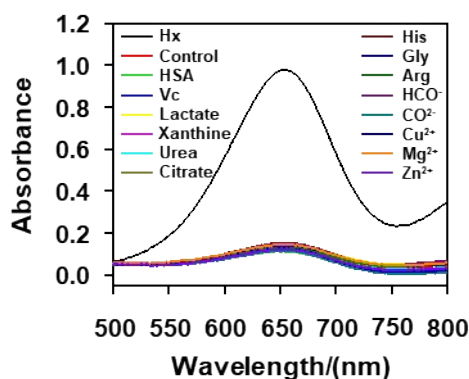

**Fig. S9** UV-vis absorption spectra for selectivity tests of the proposed Fe-PDA nanoenzyme-based sensing system for Hx. the concentrations of Hx was 200.0  $\mu\text{M}$  and each of the interferences were 500.0  $\mu\text{M}$ . The reaction were measured at 1.0 mM of TMB, 50.0  $\mu\text{g}\cdot\text{mL}^{-1}$  of Fe-PDA nanoparticles in NaAc-HAc buffer solution (5.0 mM). All experiments were incubated in 45.0  $^{\circ}\text{C}$  at pH = 3.5.

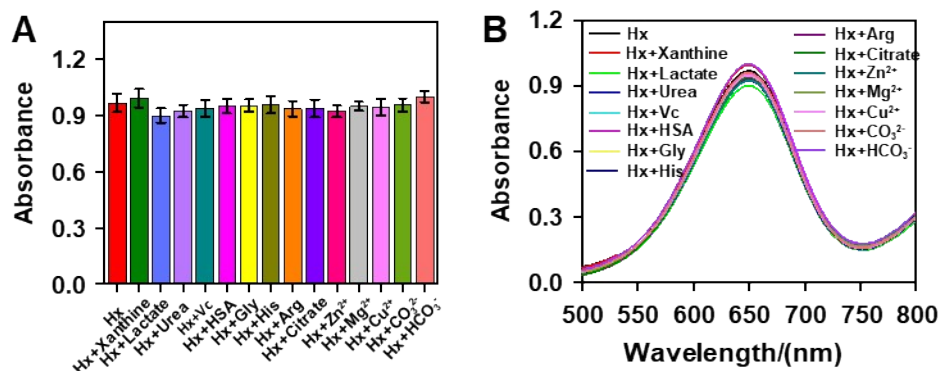

**Fig. S10** (A) Anti-interferential tests of the proposed Fe-PDA nanoenzyme-based sensing system for Hx. (B) UV-vis absorption spectra for anti-interferential tests of the proposed Fe-PDA nanoenzyme-based sensing system for Hx. the concentrations of Hx was 200.0 μM and each of the interferences were 200.0 μM. The reaction were measured at 1.0 mM of TMB, 50.0 μg·mL<sup>-1</sup> of Fe-PDA nanoparticles in NaAc-HAc buffer solution (5.0 mM). All experiments were incubated in 45.0 °C at pH = 3.5. The error bar was the deviation of the three determinations.

**Table S1** Comparative table of steady-state kinetics of different catalytic substrates through TMB oxidation.

| Enzyme mimics                       | K <sub>m</sub> (mM) |                               | V <sub>max</sub> (Ms <sup>-1</sup> ) |                               | Ref.      |
|-------------------------------------|---------------------|-------------------------------|--------------------------------------|-------------------------------|-----------|
|                                     | TMB                 | H <sub>2</sub> O <sub>2</sub> | TMB                                  | H <sub>2</sub> O <sub>2</sub> |           |
| MoS <sub>2</sub>                    | 0.525               | 0.0116                        | 5.16×10 <sup>-8</sup>                | 4.29×10 <sup>-8</sup>         | [1]       |
| AuNPs                               | 0.11                | 61.34                         | 15.39×10 <sup>-9</sup>               | 6.63×10 <sup>-9</sup>         | [2]       |
| HRP                                 | 0.434               | 3.700                         | 10.00×10 <sup>-8</sup>               | 8.710×10 <sup>-8</sup>        | [3]       |
| AuNPs@C <sub>3</sub> N <sub>4</sub> | 0.097               | 12.3                          | 1.52×10 <sup>-8</sup>                | 9.0×10 <sup>-8</sup>          | [4]       |
| Fe-PDA                              | 0.4                 | 0.16                          | 20.59×10 <sup>-8</sup>               | 21.49×10 <sup>-8</sup>        | This work |

**Table S2** Analytical characteristics of miscellaneous Hx biosensors.

| Detectors                                        | Linear range/( $\mu\text{M}$ ) | Detection limit/( $\mu\text{M}$ ) | Ref.      |
|--------------------------------------------------|--------------------------------|-----------------------------------|-----------|
| Co-doped-g- $\text{C}_3\text{N}_4$               | 7.34-450                       | 5.40                              | [3]       |
| Graphene/titanium dioxide nanocomposite          | 20-512                         | 9.5                               | [5]       |
| TPE-HPro/XO                                      | 5-120                          | 1.20                              | [6]       |
| Glassy carbon paste electrode                    | 20-80                          | 5.3                               | [7]       |
| Ferrocene carboxylic acid modified electrode     | 5-20                           | 4.5                               | [8]       |
| $\text{NH}_2$ -Cu-MOF nanosheet                  | 10-2000                        | 3.93                              | [9]       |
| Pholasin                                         | 0.5-10                         | –                                 | [10]      |
| gold nanoparticles-single-walled carbon nanohorn | 1.5-35.4                       | 0.61                              | [11]      |
| Fe-PDA nanoparticle                              | 5.13-200                       | 1.54                              | This work |

## References

- 1 T. Lin, L. Zhong, L. Guo, F. Fu and G. Chen, *Nanoscale*, 2014, **6**, 11856-11862.
- 2 Q. Xue, X. Niu, P. Liu, M. Wang, Y. Peng, H. Peng and X. Li, *Sensor. Actuat. B Chem.*, 2021, **334**, 129650.
- 3 X. Wang, Z.-Z. Lin, C.-Y. Hong and Z.-Y. Huang, *New J. Chem.*, 2021, **45**, 18307-18314.
- 4 N. Wu, Y.-T. Wang, X.-Y. Wang, F.-N. Guo, H. Wen, T. Yang and J.-H. Wang, *Analyt. Chim. Acta*, 2019, **1091**, 69-75.
- 5 J. A. V. Albelda, A. Uzunoglu, G. N. C. Santos and L. A. Stanciu, *Biosens. Bioelectron.*, 2017, **89**, 518-524.
- 6 Z. Zhang, R. T. K. Kwok, Y. Yu, B. Z. Tang and K. M. Ng, *J. Mater. Chem. B*, 2018, **6**, 4575-4578.
- 7 Ü. A. Kirgöz, S. Timur, J. Wang and A. Telefoncu, *Electrochem. Commun.*, 2004, **6**, 913-916.
- 8 A. T. Lawal and S. B. Adeloju, *Food Chem.*, 2012, **135**, 2982-2987.
- 9 S. Hu, J. Yan, X. Huang, L. Guo, Z. Lin, F. Luo, B. Qiu, K.-Y. Wong and G. Chen, *Sensor. Actuat. B Chem.*, 2018, **267**, 312-319.

- 10 D. E. Farthing, D. Sica, M. Hindle, L. Edinboro, L. Xi, T. W. B. Gehr, L. Gehr, C. A. Farthing, T. L. Larus, I. Fakhry and H. T. Karnes, *Luminescence*, 2011, **26**, 65-75.
- 11 L. Zhang, J. Lei, J. Zhang, L. Ding and H. Ju, *Analyst*, 2012, **137**, 3126-3131.
